# Supplementary material for: Requirement for phosphorylation of P53 at Ser312 in suppression of chemical carcinogenesis
Source: PubMed Central journal article supplement — Sci Rep. 2013 Oct 31;3:3105. doi: 10.1038/srep03105 (PMC3813944; doi:10.1038/srep03105), 2013-10-31
Supplement: srep03105-s1.pdf [file srep03105-s1.pdf]

**REQUIREMENT FOR PHOSPHORYLATION OF P53 AT SER312 IN  
SUPPRESSION OF CHEMICAL CARCINOGENESIS**

Elizabeth A. Slee and Xin Lu

Supplementary Figure 1

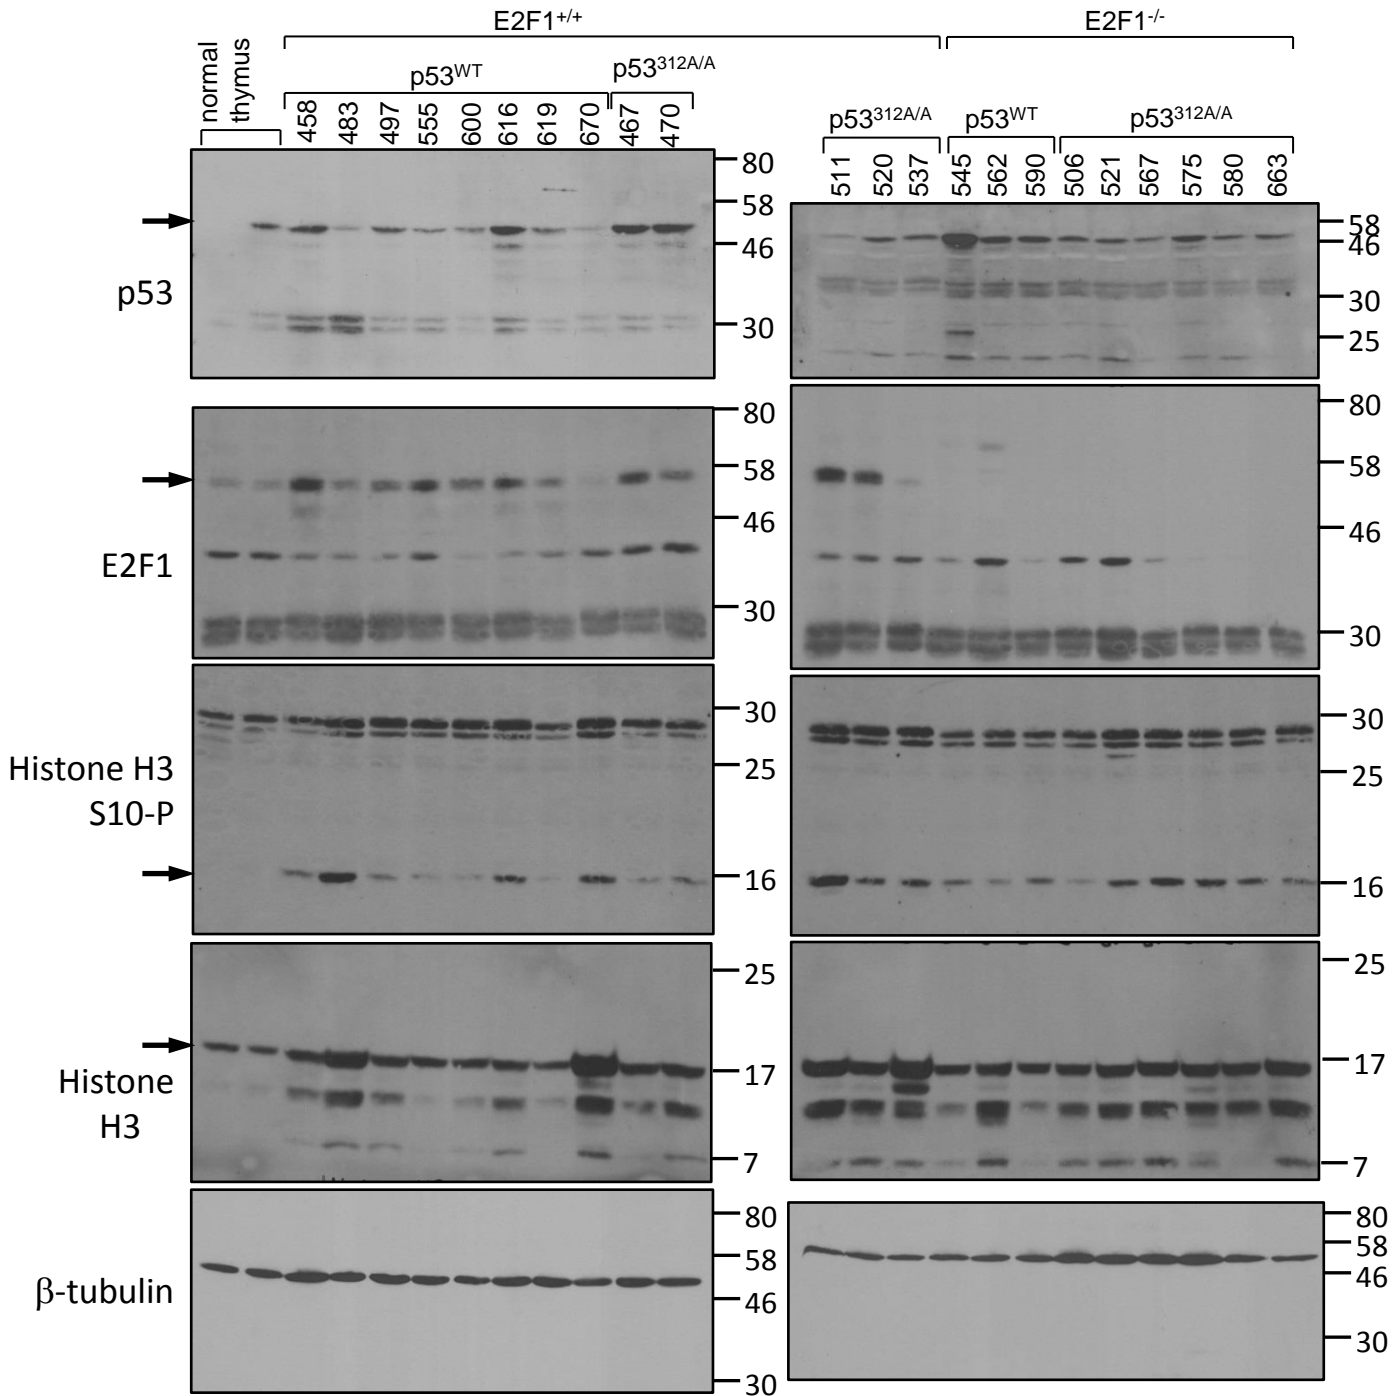

**Supplementary Figure 1**

**Enlarged western blots of thymic lymphoma tumour lysates from Figure 3B.**

The relevant bands are indicated by the arrow. Molecular weights are shown on the right hand side. 50µg of the same lysate preparation for each sample was loaded on each gel.
